# Supplementary material for: The effect of an anode functional layer on the steam electrolysis performances of protonic solid oxide cells
Source: Royal Society of Chemistry journal article supplement (doi:10.1039/d1ta02848k), 2021-01-01
Supplement: d1ta02848k1.pdf [file d1ta02848k1.pdf]

Supplementary Information for

**Effect of Anode Functional Layer on Electrochemical Performances of  $\text{BaZr}_x\text{Ce}_{0.8-x}\text{Y}_{0.1}\text{Yb}_{0.1}\text{O}_{3-\delta}$   
Protonic Solid Oxide Electrolysis Cells**

Chunmei Tang,<sup>a</sup> Katsuya Akimoto,<sup>a</sup> Ning Wang,<sup>a</sup> Laras Fadillah,<sup>a</sup> Sho Kitano,<sup>b</sup> Hiroki Habazaki,<sup>b</sup> and  
Yoshitaka Aoki<sup>\*b</sup>

<sup>a</sup> Graduate School of Chemical Sciences and Engineering, Hokkaido University, N13W8, Kita-ku, Sapporo,  
060-8628, Japan.

<sup>b</sup> Faculty of Engineering, Hokkaido University, N13W8, Kita-ku, Sapporo, 060-8628, Japan.

E-mail: [y-aoki@eng.hokudai.ac.jp](mailto:y-aoki@eng.hokudai.ac.jp)

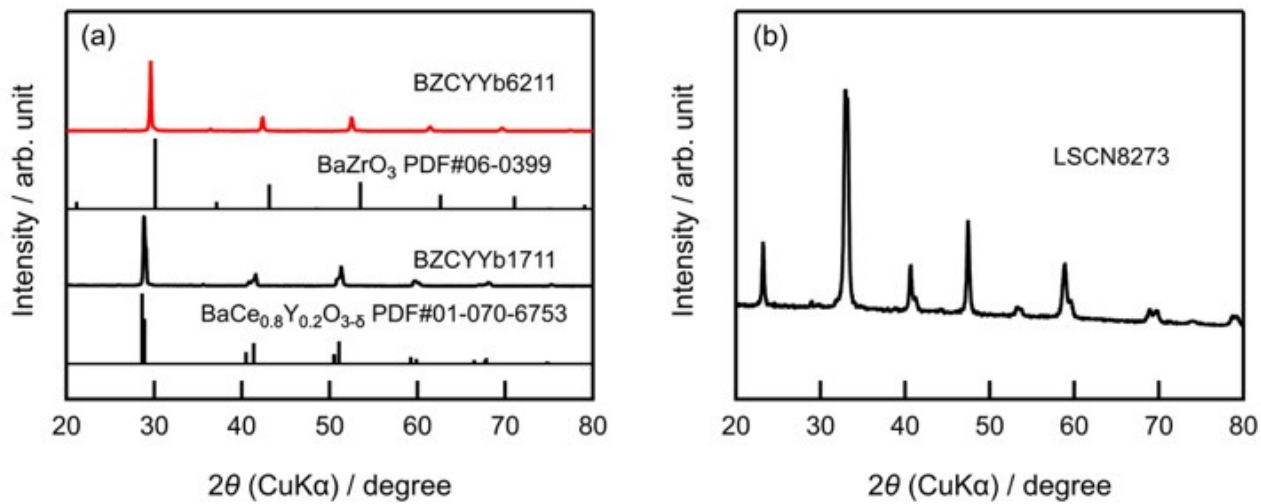

Fig. S1. XRD patterns of (a) BZCYYb1711 and BZCYYb6211 electrolyte powders, and (b) LSCN8273 anode powders.

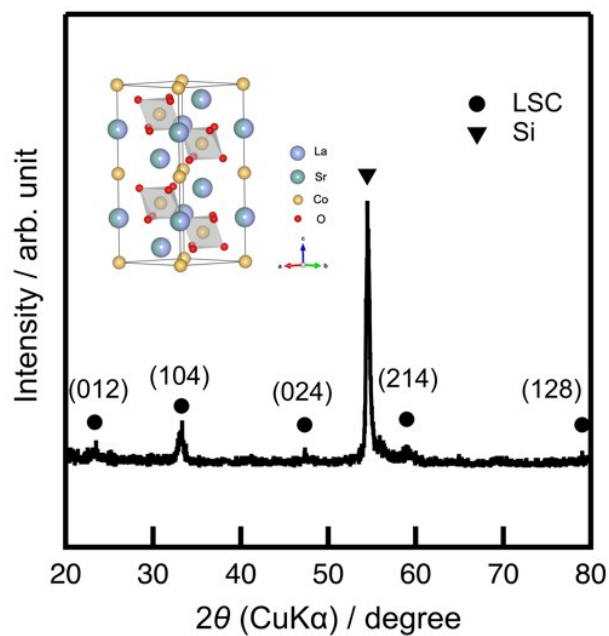

Fig. S2. XRD pattern of LSC thin film deposited on a silicon wafer.

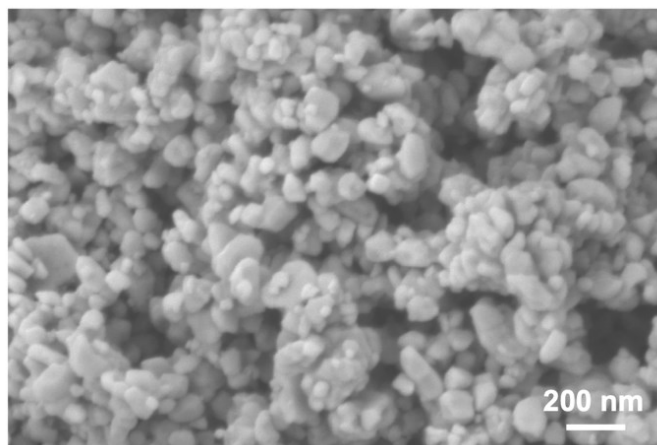

Fig. S3. SEM image of LSCN8273 powders.

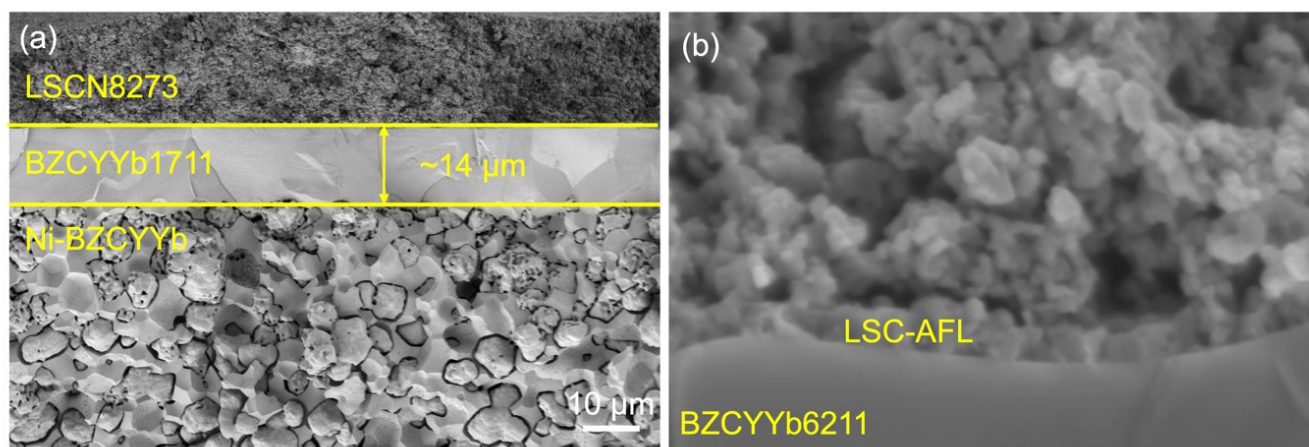

Fig. S4. (a) Cross-section SEM image of cathode-supported P-SOECs of BZCYYb1711 electrolyte. (b) Expand view of LSCN8273 anode and BZCYYb6211 electrolyte.

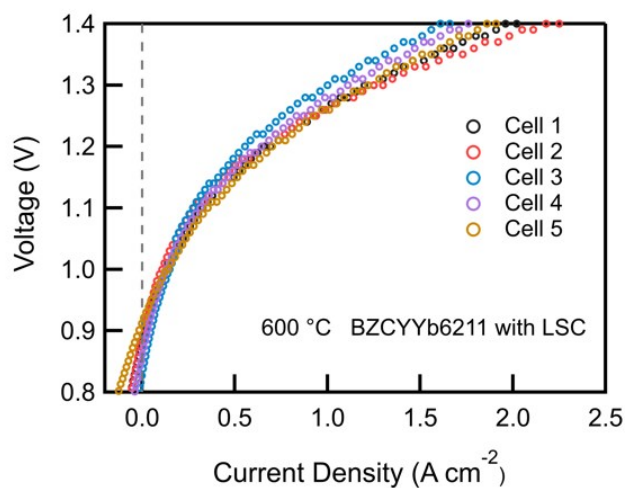

Fig. S5.  $I$ - $V$  curves for five samples of BZCYYb6211 base electrolysis cells with LSC-AFL at 600

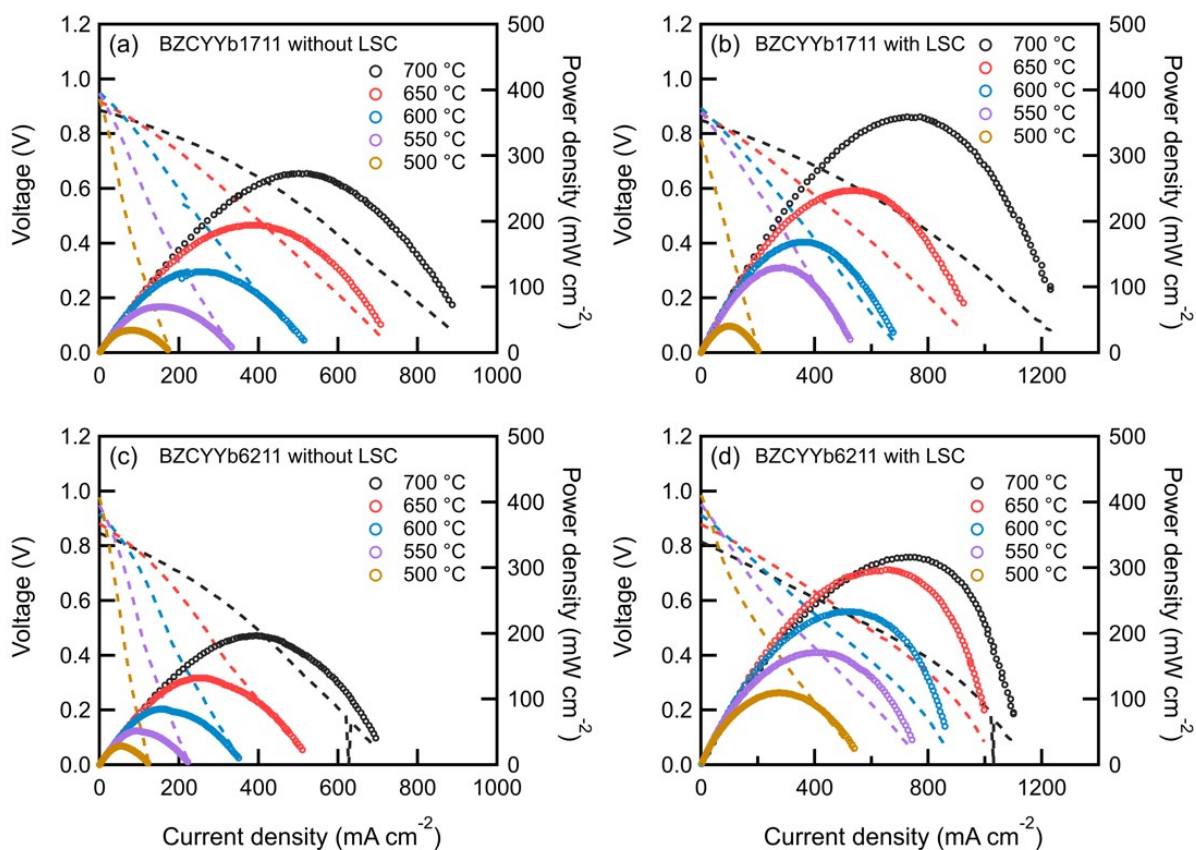

Fig. S6. Current-voltage-power ( $I$ - $V$ - $P$ ) curves of fuel cell mode for the BZCYYb1711 base cells ((a) and (b)) and the BZCYYb6211 base ones ((c) and (d)) performed with 30%– $\text{H}_2\text{O}$ /Air and humidified 10%– $\text{H}_2$ /Ar gases to the air and fuel electrodes, respectively. (a) and (c) are the cells without LSC-AFL, and (c) and (d) ones with LSC-AFL.

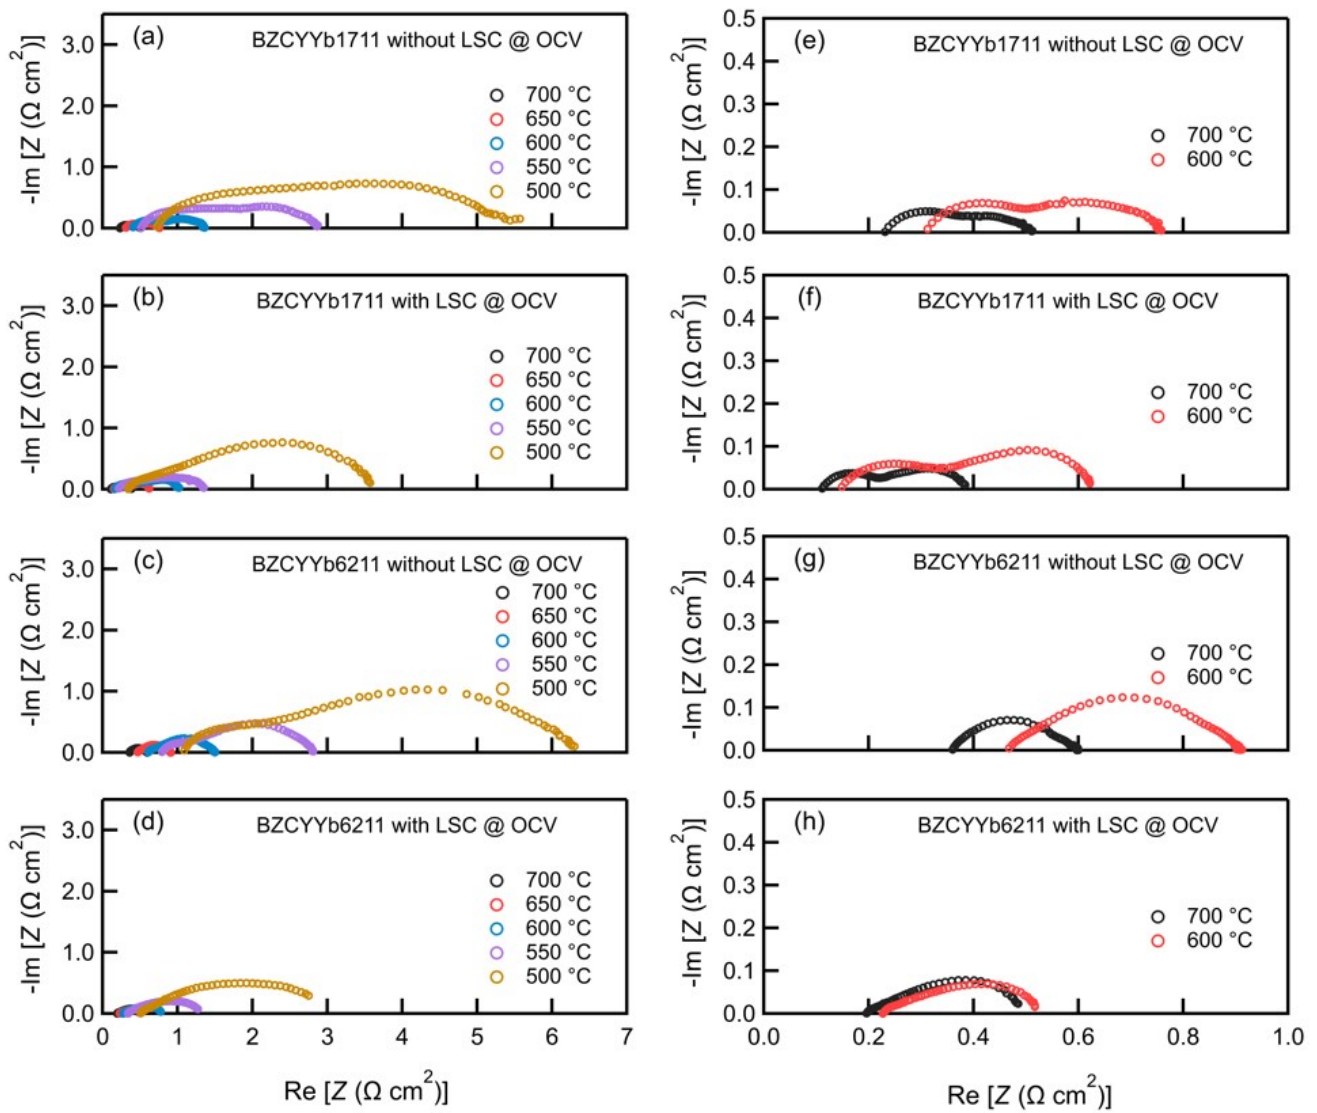

Fig. S7. EIS for BZCYYb1711 ((a) and (b)) and BZCYYb6211 ((c) and (d)) cells without and with LSC-AFL at various temperatures under OCV.

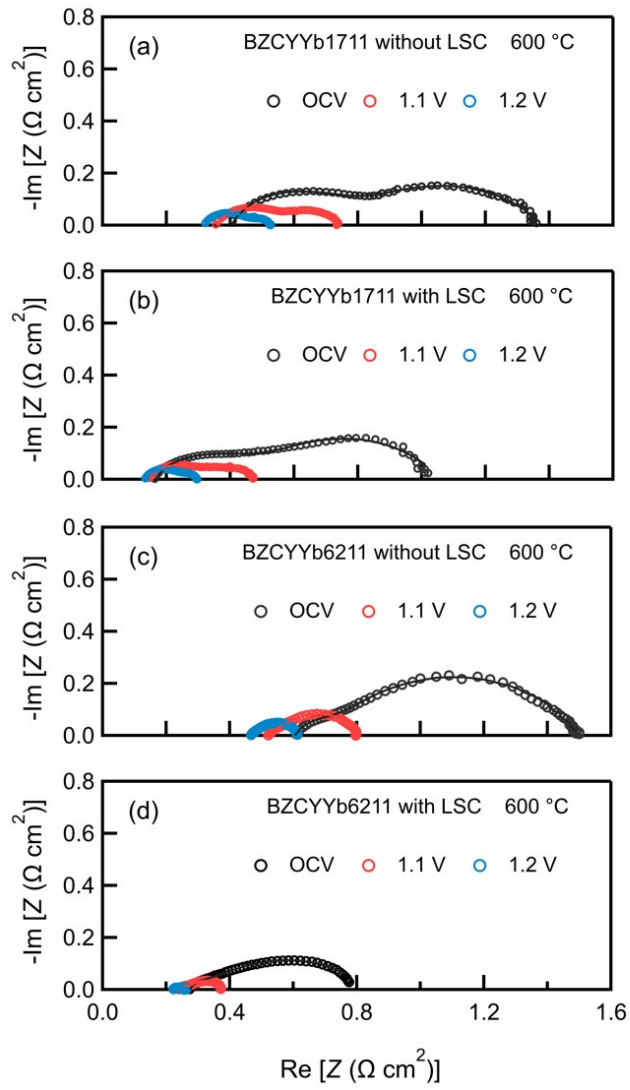

Fig. S8. EIS of BZCYYb1711 cells (e) without and (f) with LSC layer under various cell voltages at 600 °C.

Table S1 Parameters of equivalent-circuit fitting analysis for impedance spectra of BZCYYb1711 and BZCYYb6211 cells without and with LSC anode functional layer.

| P-SOECs                                  | $T$ (°C) | $R_o$ ( $\Omega$ cm <sup>2</sup> ) | $S_{HF}$ arc                          |                    |            | $S_{LF}$ arc                          |                    |            |
|------------------------------------------|----------|------------------------------------|---------------------------------------|--------------------|------------|---------------------------------------|--------------------|------------|
|                                          |          |                                    | $R_{HF}$ ( $\Omega$ cm <sup>2</sup> ) | $f_{HF}$ (Hz)      | $E_a$ (eV) | $R_{LF}$ ( $\Omega$ cm <sup>2</sup> ) | $f_{LF}$ (Hz)      | $E_a$ (eV) |
| BZCYYb1711 without LSC                   | 600 °C   | 0.30                               | 0.52                                  | $1.14 \times 10^4$ | 0.70       | 0.56                                  | $2.23 \times 10^1$ | 1.04       |
|                                          | 500 °C   | 0.61                               | 1.29                                  | $4.38 \times 10^3$ |            | 3.66                                  | $2.82 \times 10^1$ |            |
| BZCYYb6211 without LSC                   | 600 °C   | 0.52                               | 0.21                                  | $3.50 \times 10^4$ | 1.15       | 0.77                                  | $1.12 \times 10^2$ | 0.95       |
|                                          | 500 °C   | 0.83                               | 1.72                                  | $6.94 \times 10^3$ |            | 4.58                                  | $2.78 \times 10^1$ |            |
| BZCYYb6211 without LSC<br>(LSC as anode) | 600 °C   | 0.49                               | 0.10                                  | $4.98 \times 10^4$ | -          | 0.71                                  | $1.10 \times 10^2$ | -          |
|                                          | 500 °C   | 0.86                               | 0.88                                  | $5.52 \times 10^4$ |            | 8.59                                  | $2.12 \times 10^1$ |            |
| BZCYYb1711 with LSC                      | 600 °C   | 0.12                               | 0.40                                  | $1.28 \times 10^3$ | 0.44       | 0.54                                  | 3.35               | 0.88       |
|                                          | 500 °C   | 0.29                               | 0.58                                  | $2.30 \times 10^3$ |            | 2.87                                  | 7.95               |            |
| BZCYYb6211 with LSC                      | 600 °C   | 0.26                               | 0.06                                  | $8.46 \times 10^2$ | 0.09       | 0.51                                  | 3.44               | 0.79       |
|                                          | 500 °C   | 0.47                               | 0.07                                  | $7.76 \times 10^3$ |            | 2.69                                  | 1.82               |            |

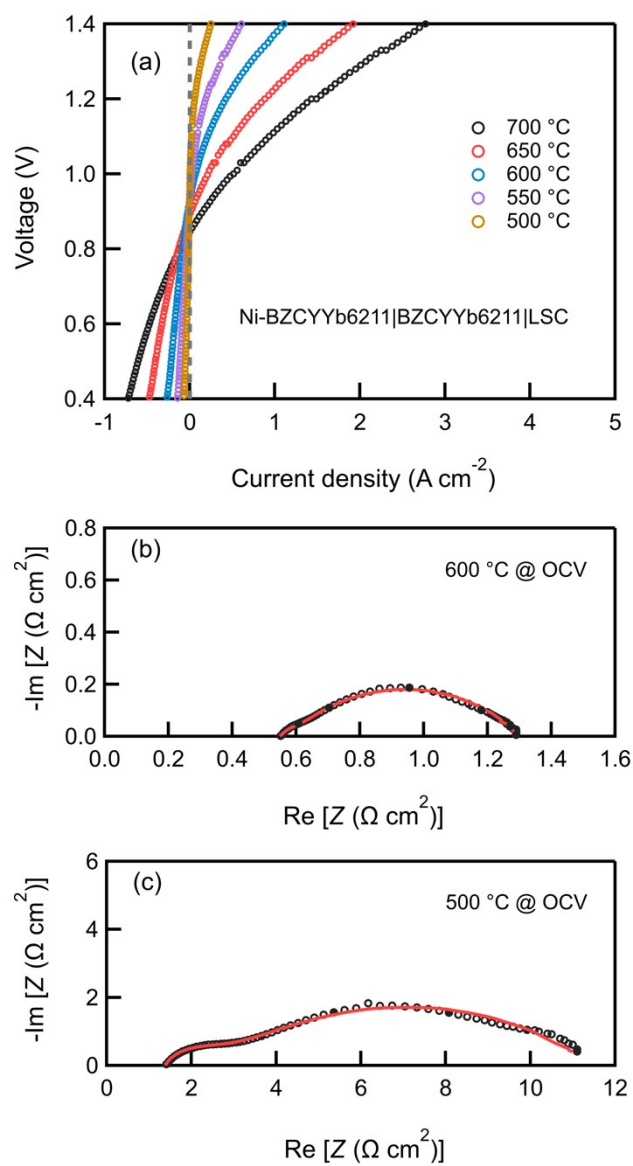

Fig. S9 (a)  $I$ - $V$  curves of BZCYYb6211 cell using a  $\text{La}_{0.5}\text{Sr}_{0.5}\text{CoO}_{3-\delta}$  (LSC) anode without AFL. The corresponding EIS at (b) 600 °C and (c) 500 °C under OCV condition.
